# Supplementary material for: Efficient Single-Strand Break Repair Requires Binding to Both Poly(ADP-Ribose) and DNA by the Central BRCT Domain of XRCC1
Source: PubMed Central journal article supplement (PMC6334254; doi:10.1016/j.celrep.2018.12.082), 2019-01-15
Supplement: mmc1.pdf [file mmc1.pdf]

**Cell Reports, Volume 26**

**Supplemental Information**

**Efficient Single-Strand Break Repair Requires  
Binding to Both Poly(ADP-Ribose) and DNA  
by the Central BRCT Domain of XRCC1**

**Luis M. Polo, Yingqi Xu, Peter Hornyak, Fernando Garces, Zhihong Zeng, Richard Hailstone, Steve J. Matthews, Keith W. Caldecott, Antony W. Oliver, and Laurence H. Pearl**

# FIGURE S1 - OLIGONUCLEOTIDE STRUCTURES AND AFFINITIES - related to FIGURE 1

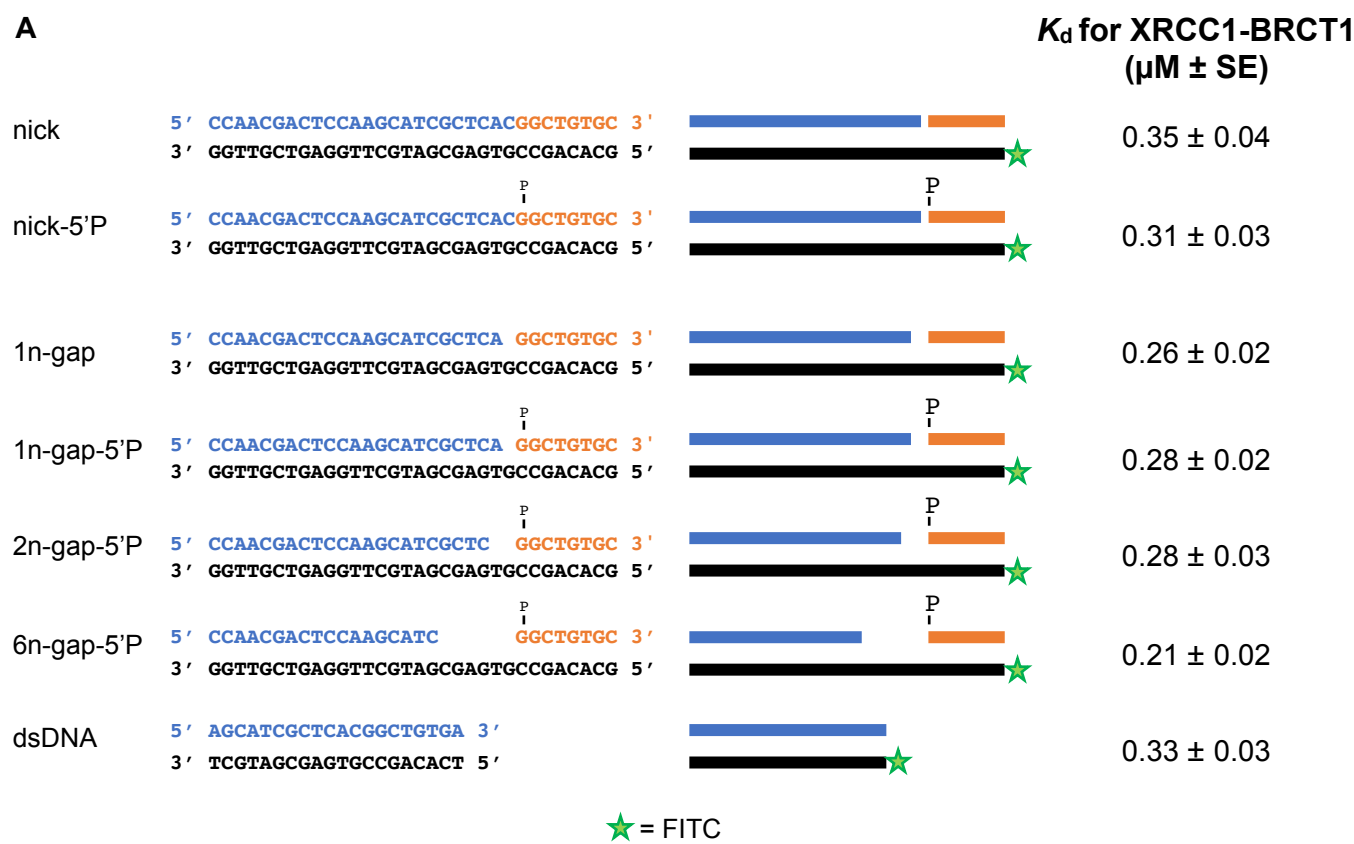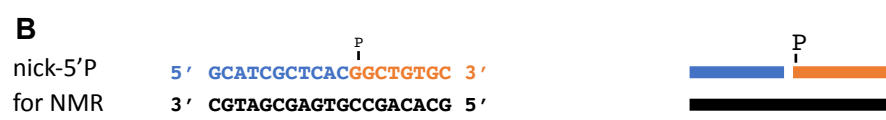

A. Schematics of DNA oligonucleotide duplexes used in this study, and their  $K_d$  for binding to XRCC1-BRCT1. The positions of 5'-phosphorylations are indicated by 'P' and the green star indicates the addition of the fluorescent dye fluorescein isothiocyanate (FITC).

B. Schematic of DNA oligonucleotide duplex used in NMR studies.

**FIGURE S2 - Chemical Shift Perturbations - related to FIGURE 2**

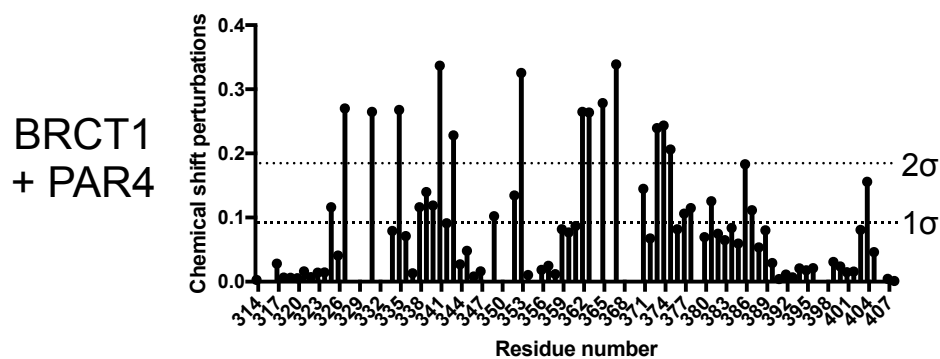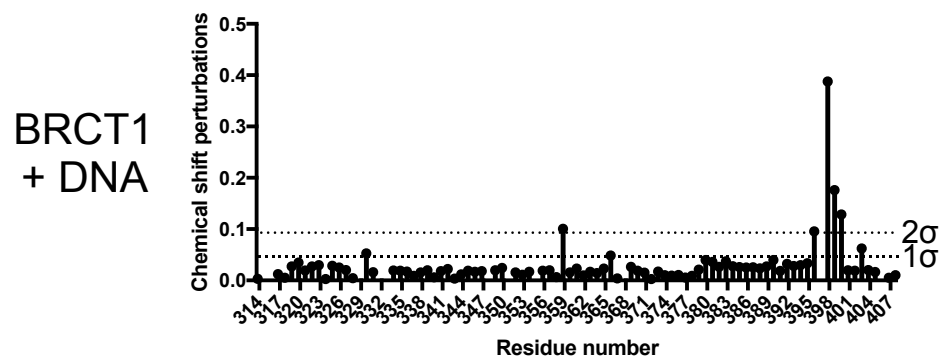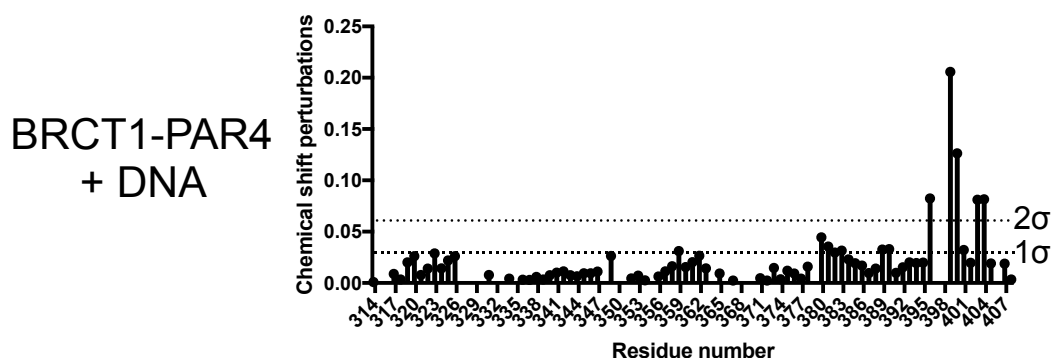

Chemical shift perturbations (CSP) by residue - residues whose CSP exceeds 2 standard deviations from the mean CSP for the experiment are highlighted in Figure 2e,f

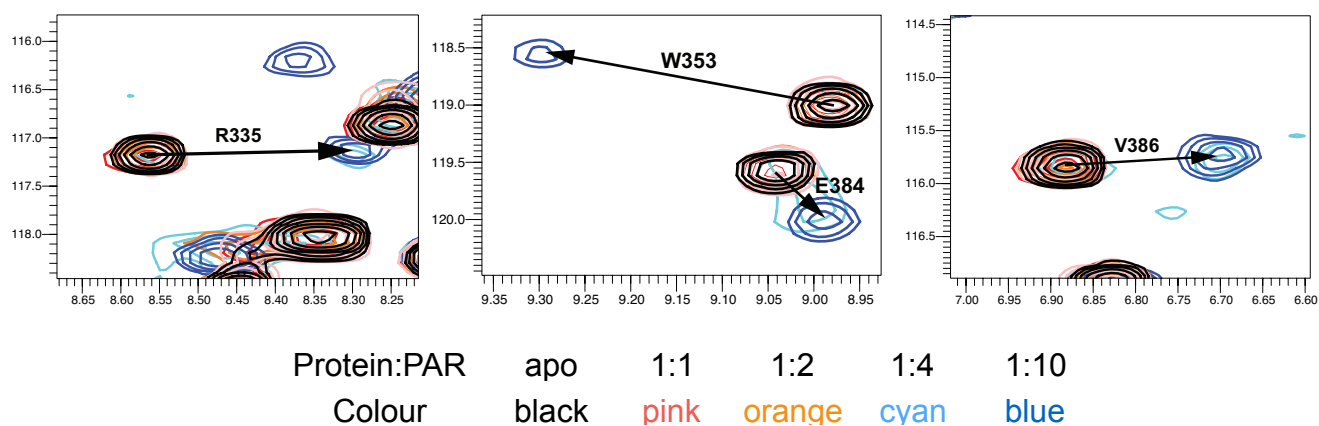

Example chemical shift perturbations (CSP) as a function of protein:PAR4 ratio. All shifts are fully saturated at 1:10 ratio.

**FIGURE S3 - OLIGONUCLEOTIDE-BINDING AFFINITIES OF XRCC1-BRCT1 MUTANTS - related to FIGURE 3**

| <b>XRCC1-BRCT1<br/>Variant/Mutant</b> | <b><math>K_d</math> for XRCC1-BRCT1<br/>(<math>\mu\text{M} \pm \text{SE}</math>)</b> |                  |
|---------------------------------------|--------------------------------------------------------------------------------------|------------------|
|                                       | <b>oligonucleotide</b>                                                               |                  |
|                                       | <b>nick</b>                                                                          | <b>nick 5'Pi</b> |
| R399                                  | $0.31 \pm 0.04$                                                                      | $0.32 \pm 0.04$  |
| Q399                                  | $0.42 \pm 0.1$                                                                       | $1.45 \pm 0.26$  |
| R399D/R400Q                           | not determined                                                                       | not determined   |
| R335A/K369A                           | $0.33 \pm 0.09$                                                                      | $1.16 \pm 0.32$  |

Binding affinities of oligonucleotides (see FIGURE S1A) for different XRCC1-BRCT1 mutants/variants.

**FIGURE S4 - XRCC1 EXPRESSION LEVELS AND COMET ASSAYS - related to FIGURE 4**

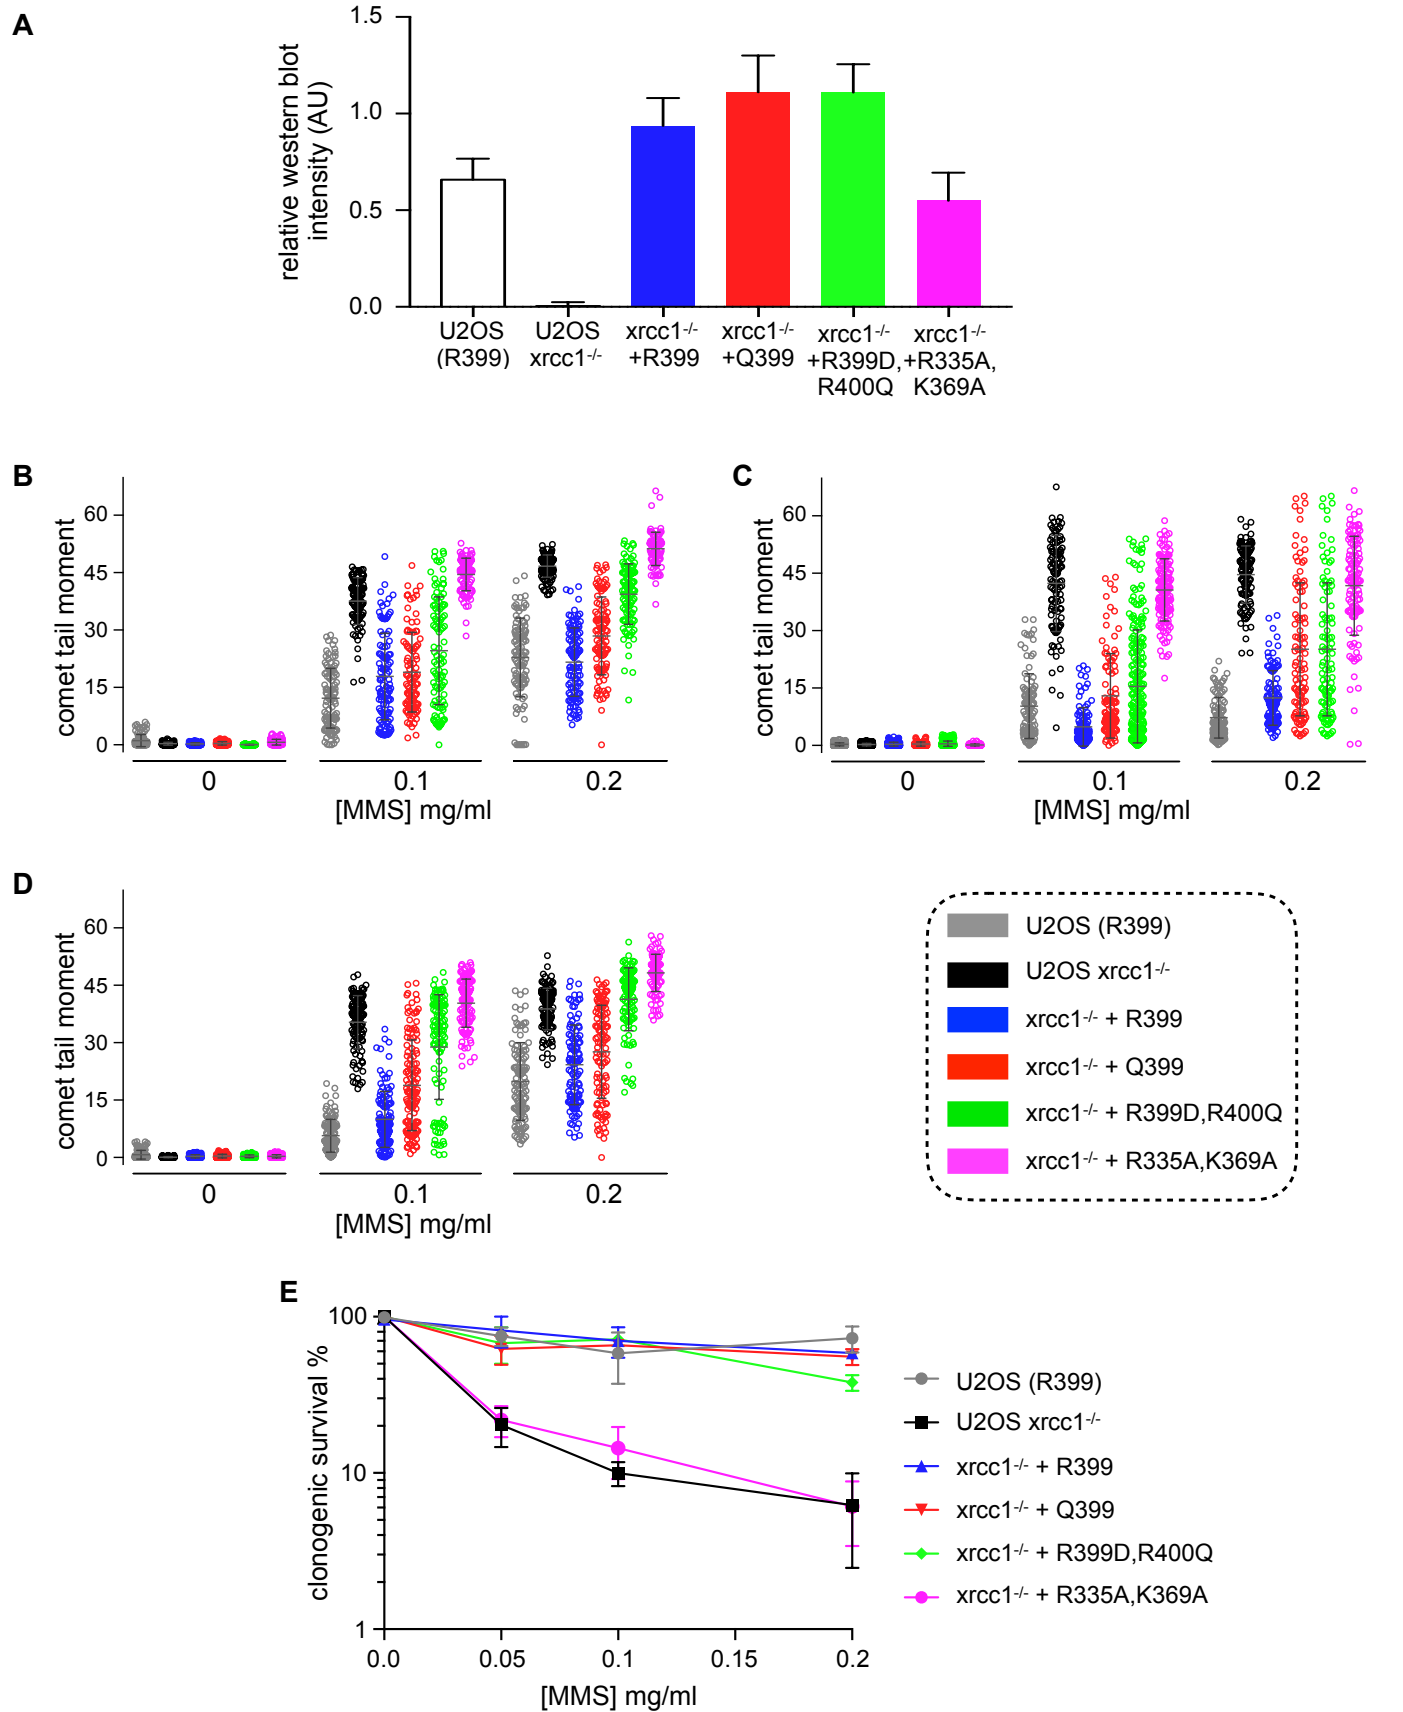

A. Relative expression levels of XRCC1 proteins determined by western blot intensity, in : U2OS cells, *XRCC1* gene edited cells, and gene edited cells with different XRCC1 variants or mutants added back. All mutants and variants are expressed at least at levels comparable to the wild-type U2OS cells.

B,C,D Replicate alkaline comet assays summarised in **FIGURE 4C**. The legend is shown in the dashed cartouche.

E. Clonogenic survival assay for U2OS variants and mutants (see **METHODS**).
